# Supplementary material for: Assessment of Meteorological Variables and Air Pollution Affecting COVID-19 Cases in Urban Agglomerations: Evidence from China
Source: MDPI journal article supplement (doi:10.3390/ijerph19010531), 2022-01-04
Supplement: s1 [file s1]

# **Assessment of meteorological variables and air pollution affecting COVID-19 cases in urban agglomerations: evidence from China**

**Mingyue Zhao <sup>1</sup>, Yuanxin Liu <sup>2, \*</sup> and Amatus Gylbag <sup>1</sup>**

<sup>1</sup> Institute of Environment and Sustainable Development in Agriculture, Chinese Academy of Agricultural Sciences, Beijing 100081, China

<sup>2</sup> Academy for Multidisciplinary Studies, Capital Normal University, Beijing 100048, China

\* Corresponding at: [yuanxinliu@cnu.edu.cn](mailto:yuanxinliu@cnu.edu.cn)

Table S1 The cities involved in the 4 main urban agglomerations in the study.

| No. | Name | Provinces involved | Cities involved                                                                                                                    |
|-----|------|--------------------|------------------------------------------------------------------------------------------------------------------------------------|
| 1   | MYR  | Hubei              | Huangshi, Ezhou, Huanggang, Xiaogan, Xianning, Xiantao, Qianjiang, Tianmen, Xiangyang, Yichang, Jingzhou, Jingmen                  |
|     |      | Hunan              | Changsha, Zhuzhou, Xiangtan, Yueyang, Yiyang, Changde, Hengyang, Loudi                                                             |
|     |      | Jiangxi            | Nanchang, Jiujiang, Jingdezhen, Yingtian, Xinyu, Yichun, Pingxiang, Shangrao, Fuzhou, Ji'an                                        |
| 2   | BTH  | -                  | Beijing;                                                                                                                           |
|     |      | -                  | Tianjin;                                                                                                                           |
|     |      | Hebei              | Baoding, Tangshan, Langfang, Shijiazhuang, Qinhuangdao, Handan, Xingtai, Zhangjiakou, Chengde, Cangzhou, Hengshui                  |
| 3   | YRD  | -                  | Shanghai;                                                                                                                          |
|     |      | Jiangsu            | Nanjing, Wuxi, Changzhou, Suzhou, Nantong, Yancheng, Yangzhou, Zhenjiang, Taizhou                                                  |
|     |      | Zhejiang           | Hangzhou, Ningbo, Shaoxing, Huzhou, Jiaxing, Jinhua, Zhoushan, Taizhou, Wenzhou                                                    |
|     |      | Anhui              | Hefei, Wuhu, Maanshan, Tongling, Anqing, Xuancheng, Chizhou, Chuzhou                                                               |
| 4   | PRD  | Guangdong          | Guangzhou, Shenzhen, Foshan, Dongguan, Huizhou, Zhongshan, Zhuhai, Jiangmen, Zhaoqing, Shanwei, Yangjiang, Qingyuan, Yunfu, Heyuan |

Abbreviations: BTH, Beijing-Tianjin-Hebei urban agglomeration; YRD, Yangtze River Delta urban agglomeration; MYR, Middle reaches of the Yangtze River urban agglomeration; PRD, Pearl River Delta urban agglomeration.

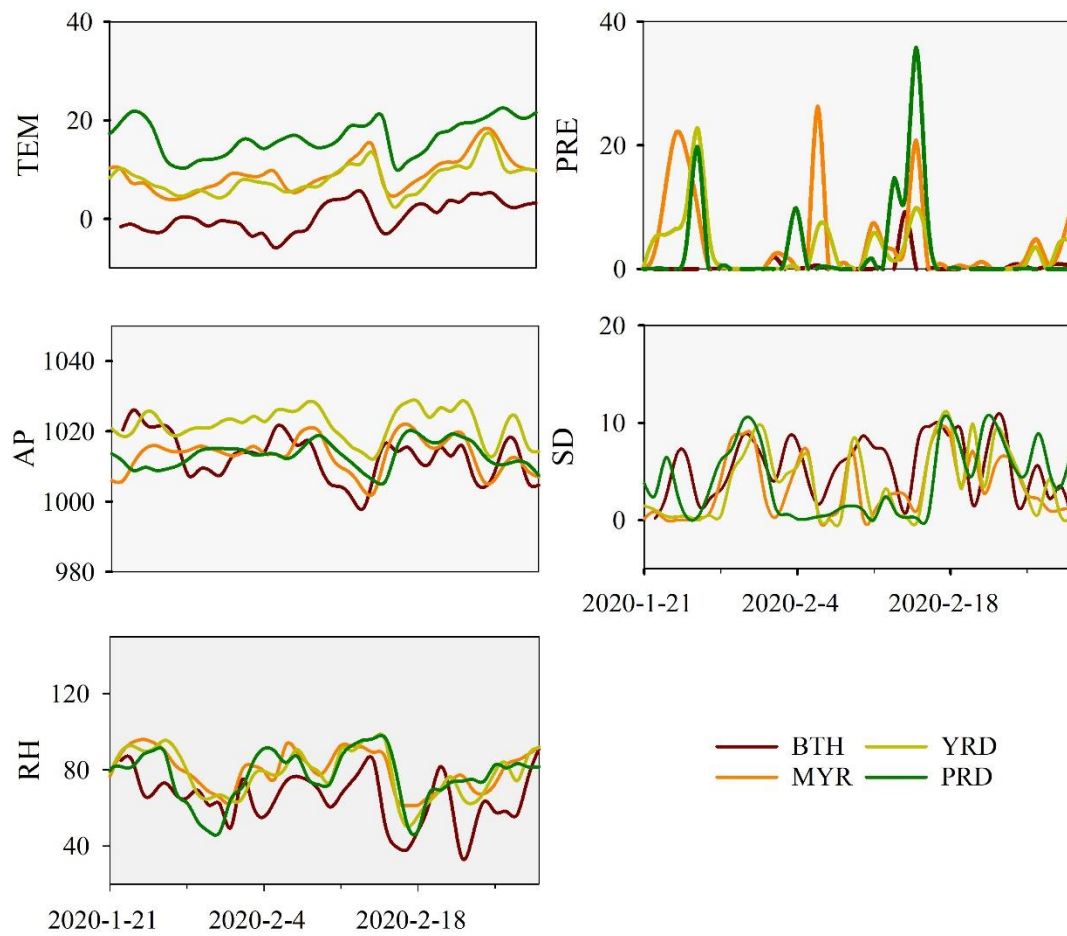

Figure S1 Temporal variations of meteorological variables

Abbreviations: TEM, temperature; PRE, precipitation; AP, atmospheric pressure; SD, sunshine duration; RH, relative humidity.

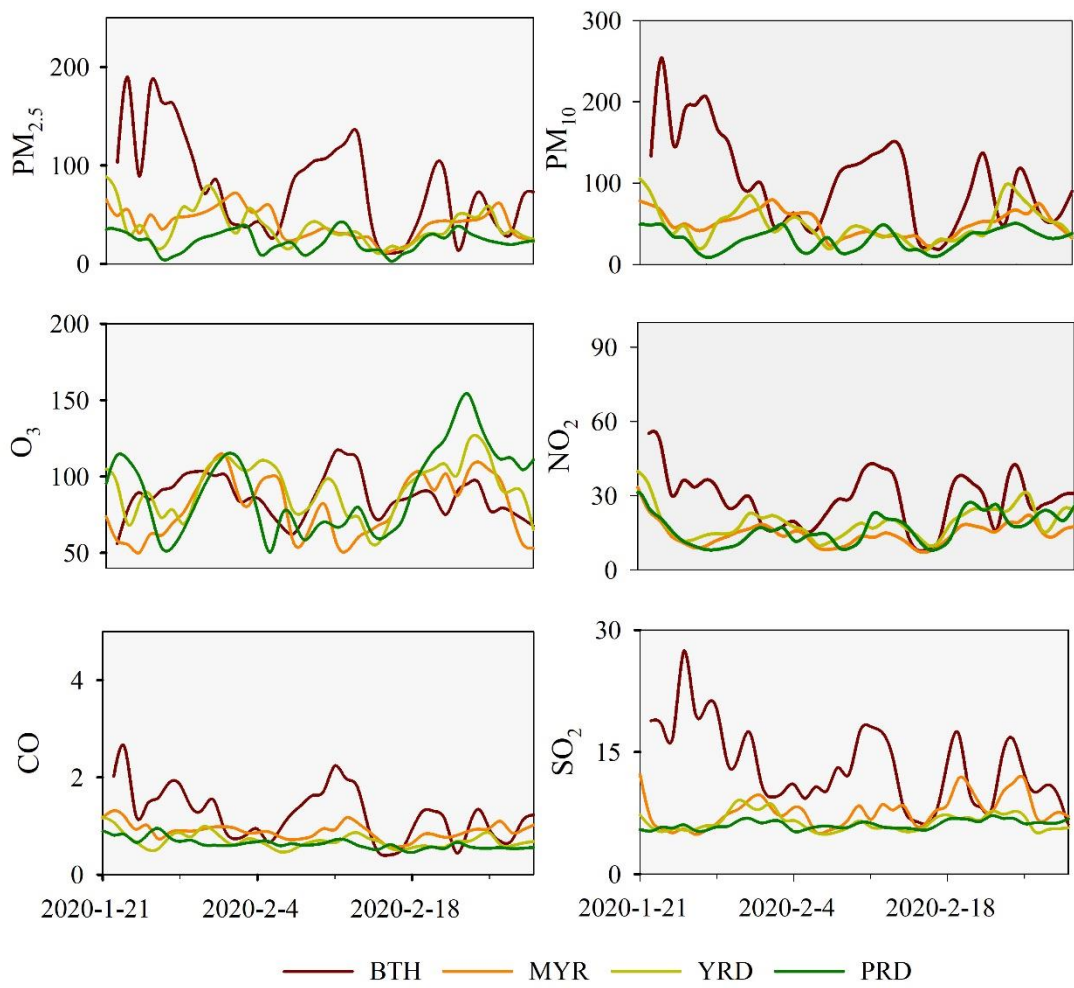

Figure S2 Temporal variations of air pollution variables

Abbreviations: PM<sub>2.5</sub>, particulate matter with aerodynamic diameter  $\leq 2.5\mu\text{m}$  ; PM<sub>10</sub>, particulate matter with aerodynamic diameter  $\leq 10\mu\text{m}$  ; O<sub>3</sub>, ozone; NO<sub>2</sub>, nitrogen dioxide; CO, carbon monoxide; SO<sub>2</sub>, sulfur dioxide.
